# Supplementary material
Source: publisher figshare collection journal article supplement (https://sage.figshare.com/ndownloader/files/14242448)
Supplement: Supplementary file 1 [file 14242448]

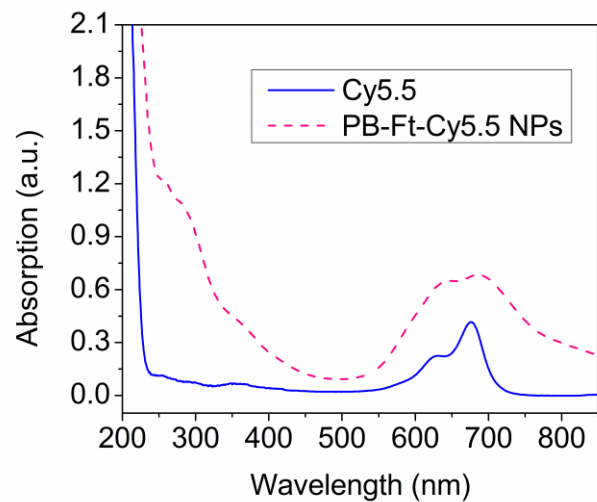

**Supplementary Figure 1.** UV-Vis absorption spectra of Cy5.5 and PB-Ft-Cy5.5 NPs.

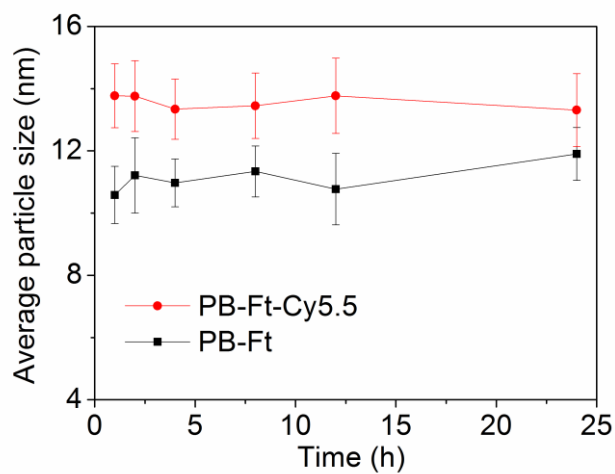

**Supplementary Figure 2.** Average particle size of PB-Ft and PB-Ft-Cy5.5 NPs in pH 7.4 PBS.

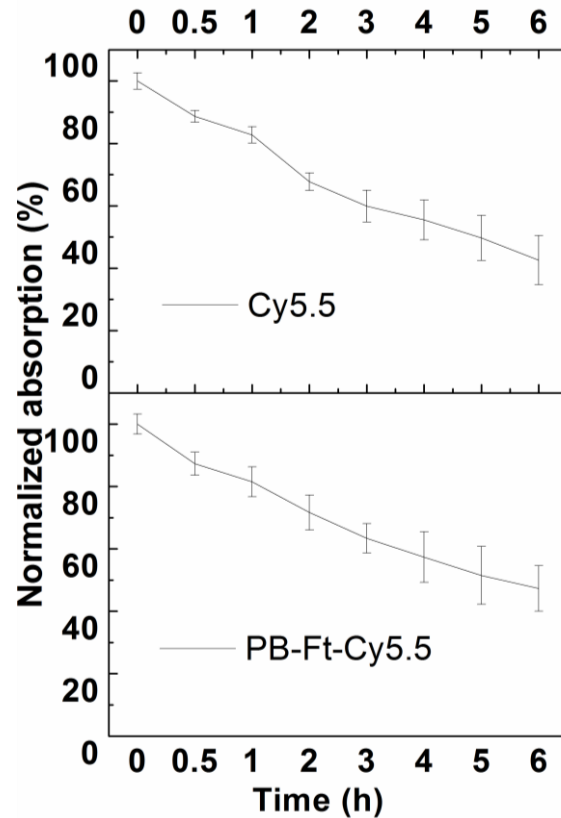

**Supplementary Figure 3.** Normalized fluorescent intensity of PB-Ft-Cy5.5 NPs after irradiating with a 60 W light bulb for 0.5 h, 1 h, 2 h, 3 h, 4 h, 5 h and 6 h. The fluorescent absorption at 680 nm was measured to evaluate the photostability of the samples.

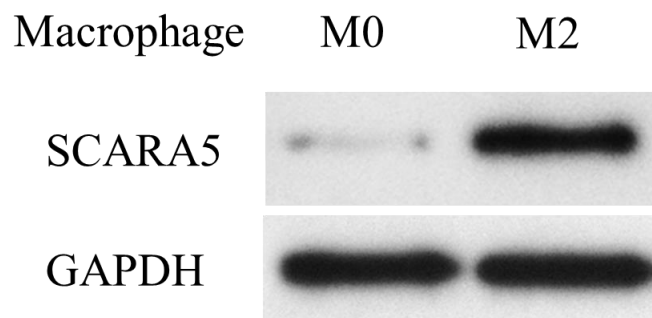

**Supplementary Figure 4.** Expression of SCARA5 in bone marrow-derived macrophages (M0 subtype) and M2-polarized macrophages. GAPDH was used as a control for protein load and integrity.

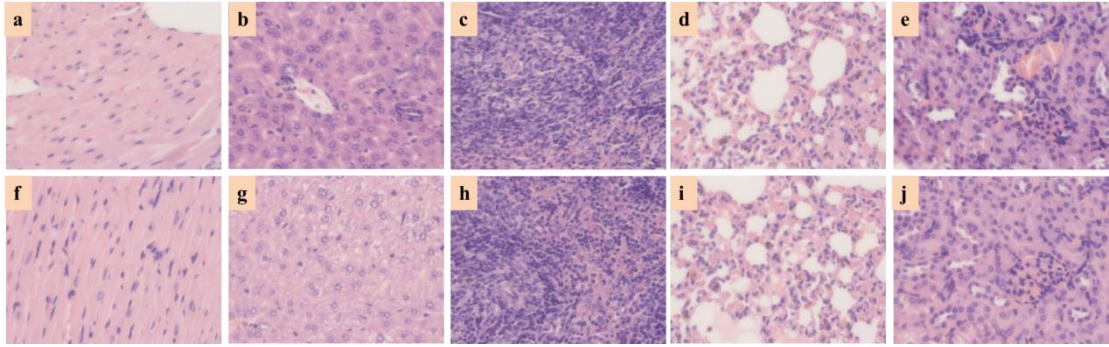

**Supplementary Figure 5.** H&E stained tissue sections of major organs, including the heart, liver, spleen, lung and kidney collected from control and GEM+PB-Ft NPs photothermal therapy groups. Magnification was at 400 $\times$ .
